# Supplementary material for: A fluorescence “switch-on” approach to detect hydrazine in aqueous solution at neutral pH
Source: Royal Society of Chemistry journal article supplement (doi:10.1039/c4ay00533c), 2014-01-01
Supplement: c4ay00533c1.pdf [file c4ay00533c1.pdf]

## Electronic Supplementary Information (ESI)

### A fluorescence “switch-on” approach to detect hydrazine in aqueous solution at neutral pH

Dian-Yun Qu,<sup>a,1</sup> Jin-Long Chen,<sup>a,b,c,1\*</sup> Bin Di<sup>a, b\*</sup>

<sup>a</sup>*Department of Pharmaceutical Analysis, China Pharmaceutical University, Nanjing 210009, China*

<sup>b</sup>*Key Laboratory of Drug Quality Control and Pharmacovigilance, China Pharmaceutical University, Ministry of Education, Nanjing 210009, China*

<sup>c</sup>*State Key Laboratory of Medicinal Chemical Biology, Nankai University, Tianjin, 300071, China*

<sup>1</sup> *Dian-Yun Qu and Jin-Long Chen contributed equally to this work.*

\*Address corresponding to this author. Tel: +86 25 83271269; fax: +86 25 83271269. E-mail address: dibin@cpu.edu.cn, chenjl\_4@hotmail.com.

**Scheme S1** Synthesis of 3, 6-diacetoxyfluoran (FDA)

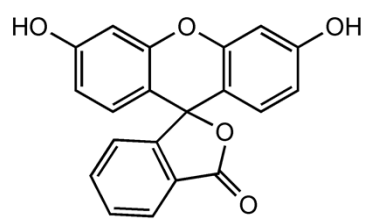

Fluorescein

Acetic Anhydride

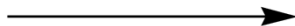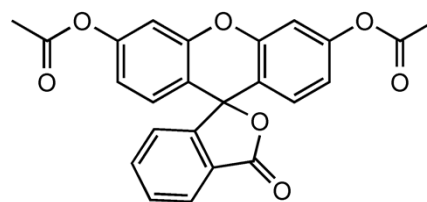

FDA (F)

**Fig. S1** FT-IR spectrum of FDA (KBr,  $\text{cm}^{-1}$ )

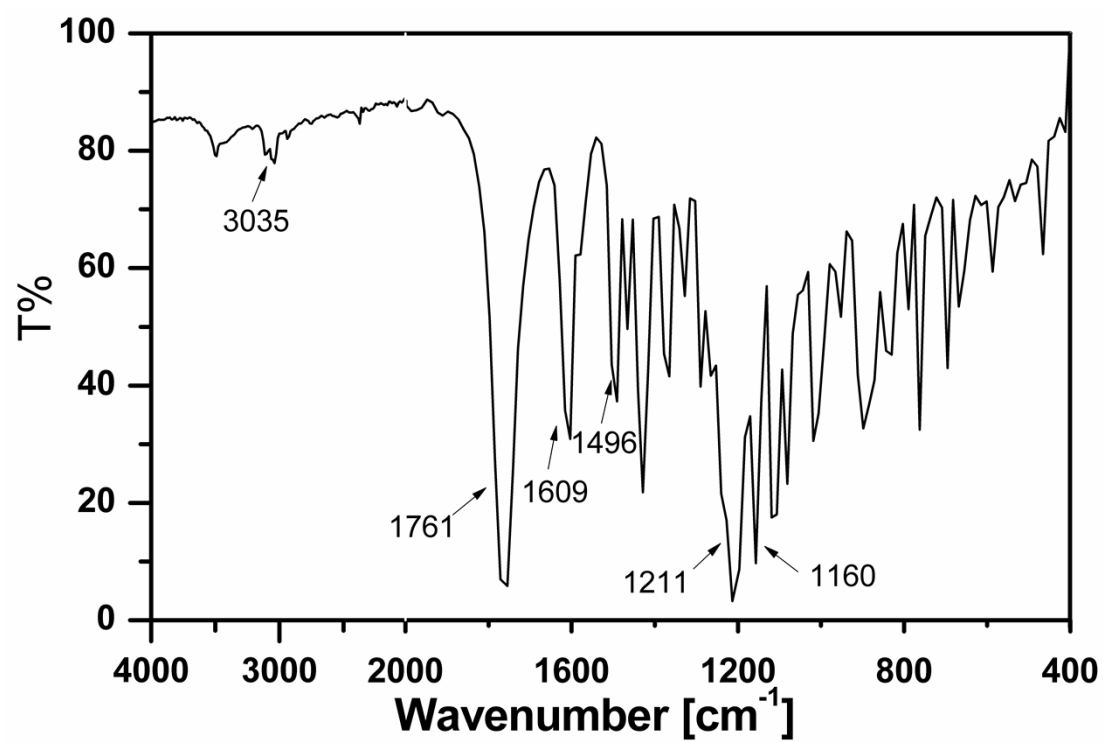

**Fig. S2**  $^1\text{H}$  NMR spectrum of FDA in DMSO- $\text{d}_6$

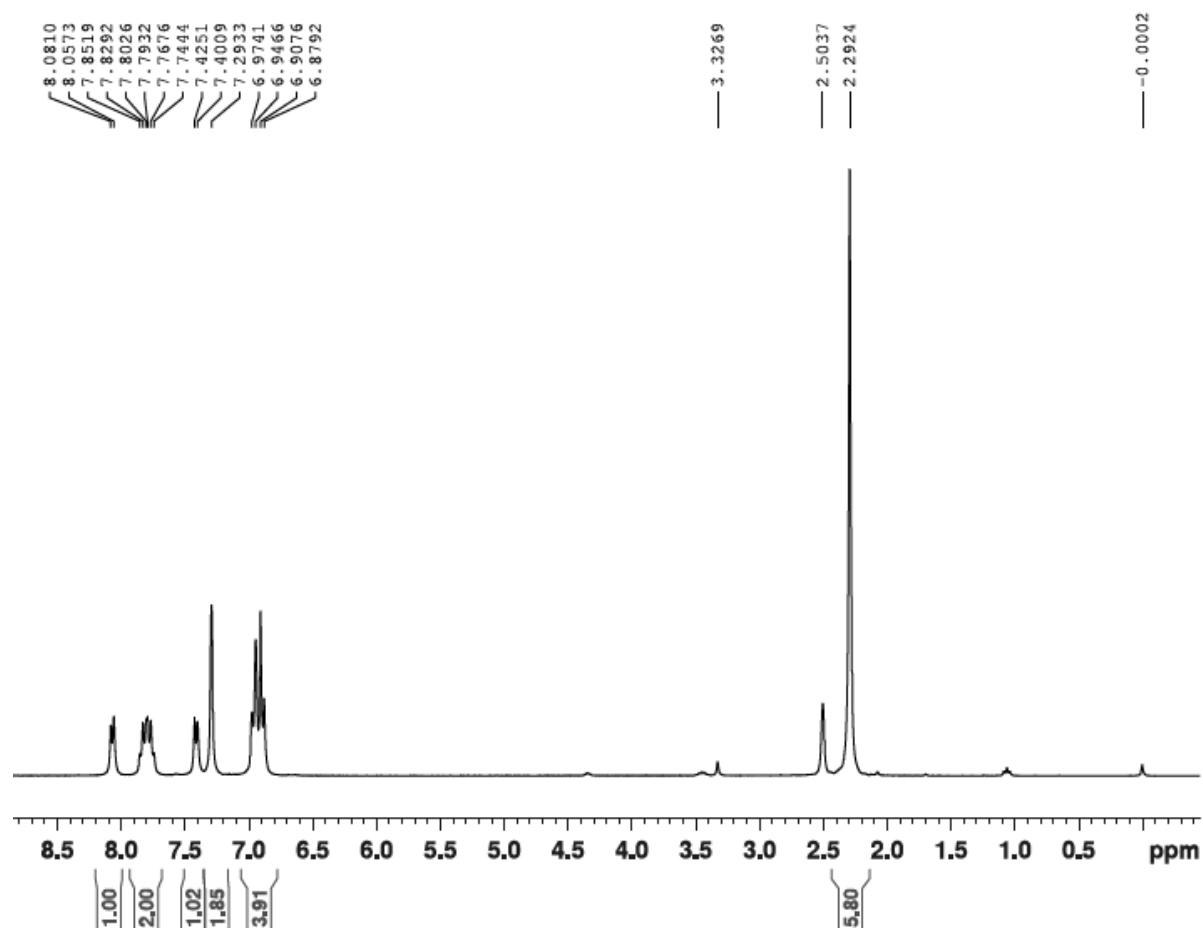

**Fig. S3** <sup>13</sup>C NMR spectrum of FDA in DMSO-d<sub>6</sub>

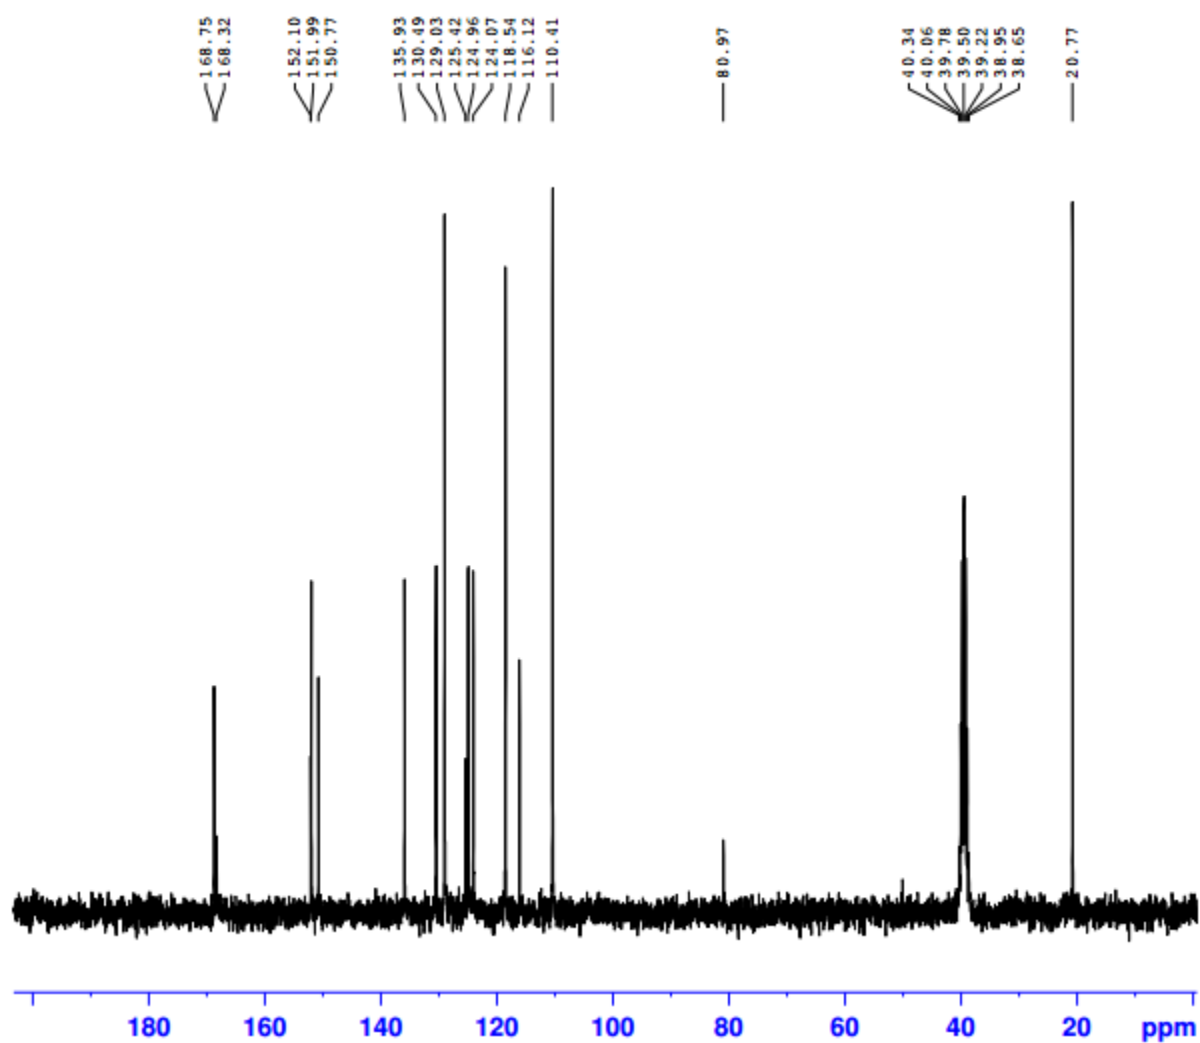

**Fig.S4** Changes of fluorescence intensity of FDA and hydrazine at 515

nm with time. Experimental conditions:  $[F] = 5.0 \times 10^{-6}$  M,  $[\text{Hydrazine}] = 5.0 \times 10^{-4}$  M, Tris buffer (pH 7.5, 5.0 mM)

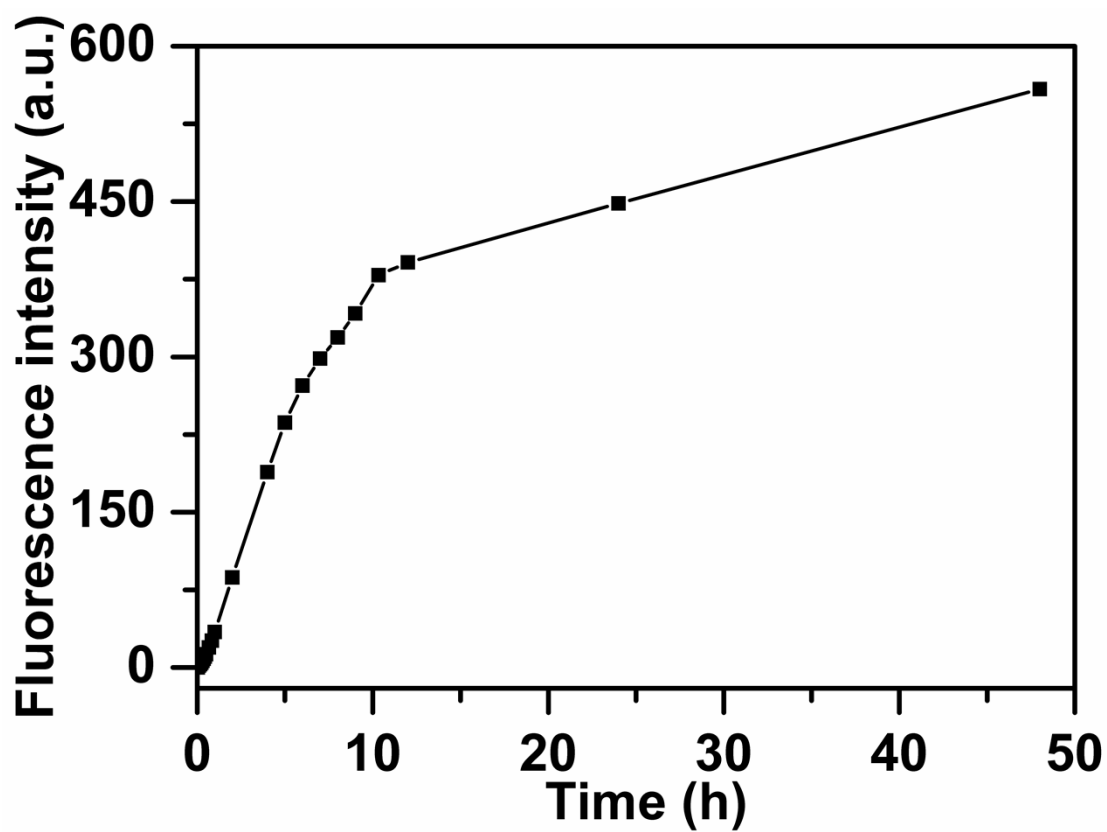

**Fig.S5** Fluorescence response of FDA to hydrazine, common anions and

cations respectively. Experimental conditions:  $[F] = 5.0 \times 10^{-6}$  M,  $[\text{Hydrazine}] = [M^{n+}] = [A^{n-}] = 5.0 \times 10^{-4}$  M, a Tris buffer (pH 7.5, 5.0 mM)

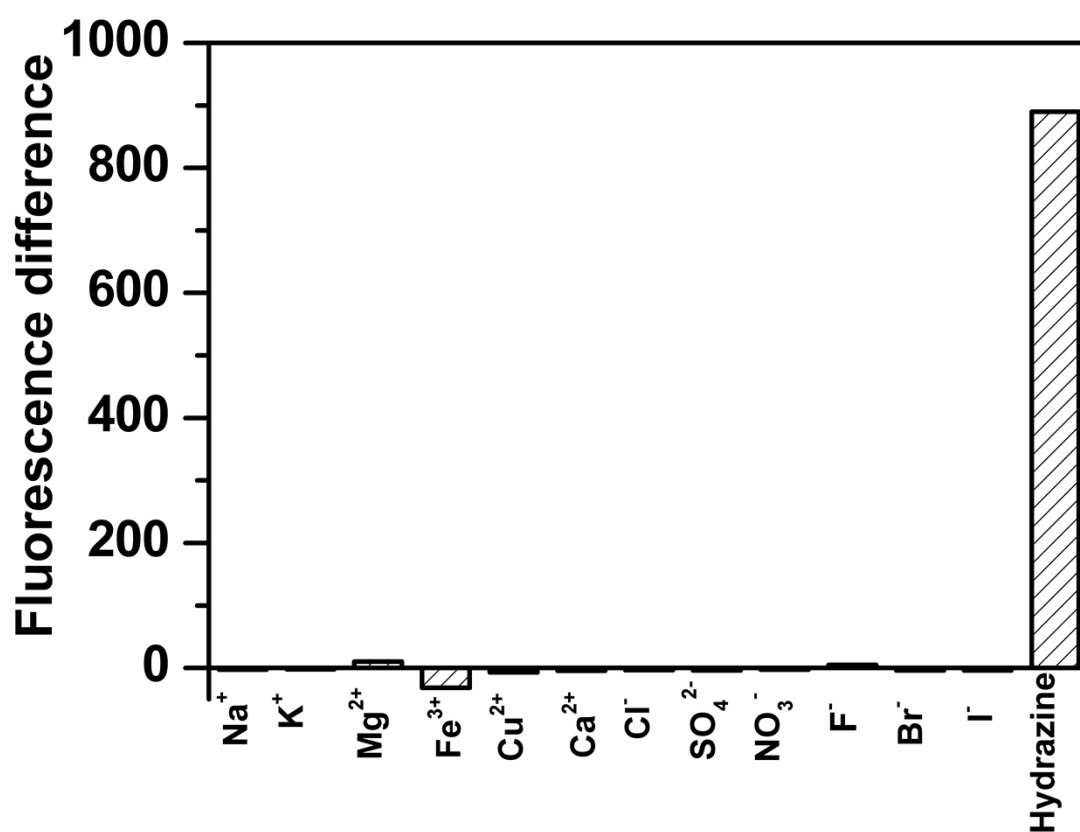

**Fig.S6** Fluorescence response of FDA to hydrazine with co-exist

common anions and cations. Experimental conditions:  $[F] = 5.0 \times 10^{-6} \text{ M}$ ,  $[\text{Hydrazine}] = [M^{n+}] = [A^{n-}] = 5.0 \times 10^{-4} \text{ M}$ , a Tris buffer (pH 7.5, 5.0 mM)

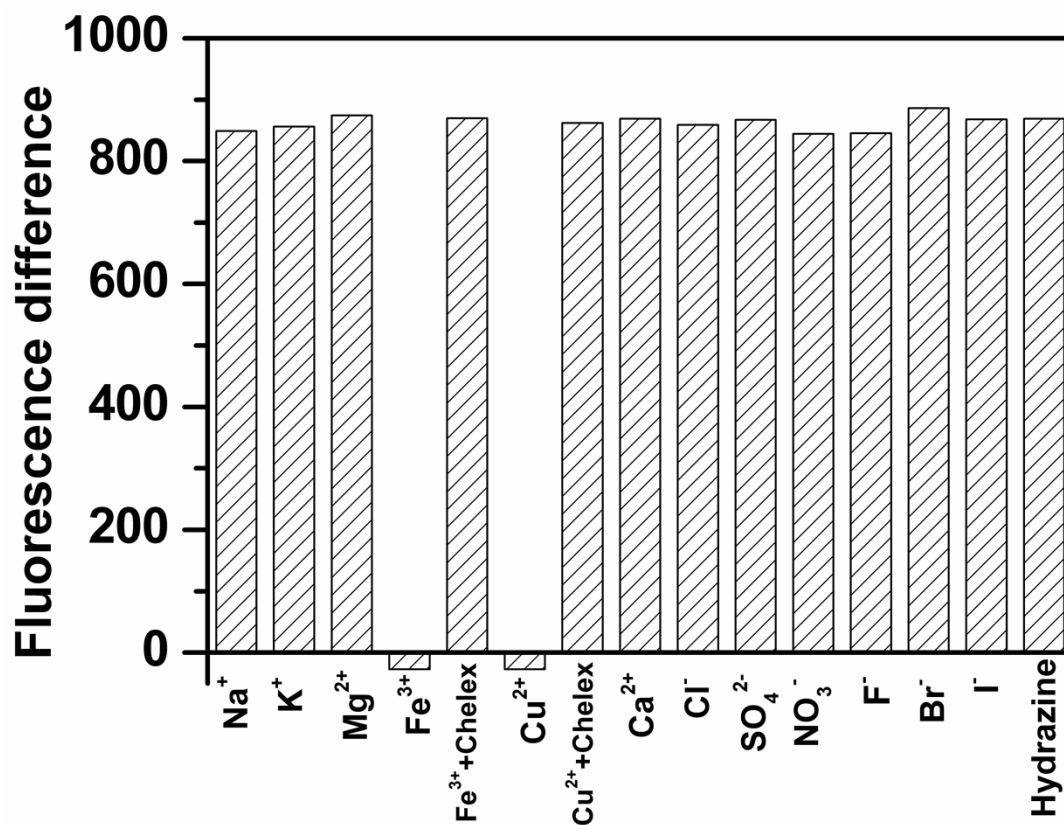

Table S1



Comparison of the working conditions and analytical characteristics of several selected fluorimetric methods for detection of hydrazine

| Reagents                                                                 | Working conditions                    | Linear range<br>( $\times 10^{-7}$ mol L <sup>-1</sup> ) | LOD<br>( $\times 10^{-9}$ mol L <sup>-1</sup> ) | References |
|--------------------------------------------------------------------------|---------------------------------------|----------------------------------------------------------|-------------------------------------------------|------------|
| 5-Chlorosalicylaldehyde                                                  | Ethanol/water/acetatic acid (30/66/4) | 2-93                                                     | 80                                              | [2]        |
| Dichlorofluoresceinacetates                                              | Tris buffer (pH 8.0)/DMSO (1/1 )      | 0-250                                                    | 90                                              | [14]       |
| 2-(4-((4-(Benzo[d]thiazol-2-yl)phenyl)ethynyl)benzylidene)-malononitrile | THF/H <sub>2</sub> O (1/1)            | 0.6-1.2                                                  | 3.4                                             | [11]       |
| Levulinated Coumarin                                                     | Acetate buffer (pH 4.5)/DMSO (3/7)    | -                                                        | 2460                                            | [13]       |
| Cy7A                                                                     | Acetate buffer (pH 4.5)/DMSO (1/9 )   | 100-800                                                  | 25                                              | [3]        |
| 3, 6-diacetoxyfluoran                                                    | Tris buffer (pH 7.5, 5.0mM)           | 12.5-250                                                 | 31                                              | This work  |
